# Supplementary material
Source: PubMed Central journal article supplement (PMC6732227)
Supplement: NIHMS1018936-supplement-Supplement_Table_1.pdf [file NIHMS1018936-supplement-Supplement_Table_1.pdf]

**Suppl. Table 1.** Primary antibodies used for western blotting

| Antibody                        | Dilution Used | Manufacturer                                    | Catalog Number | Clonality  | Role                                  |
|---------------------------------|---------------|-------------------------------------------------|----------------|------------|---------------------------------------|
| Mouse anti-neuronal nuclei IgG  | 1:5,000       | Millipore; Darmstadt, Germany                   | MAB377         | Monoclonal | Specific neuronal marker              |
| Goat anti-cleaved caspase 3 IgG | 1:1,000       | R&D Systems; Minneapolis, MD, USA               | AF-605-NA      | Polyclonal | Mediator of apoptosis                 |
| Rabbit anti-TNF $\alpha$ IgG    | 1:100         | Abcam; Cambridge, UK                            | Ab6671         | Polyclonal | Marker of inflammation                |
| Mouse anti-CD95 IgG             | 1:100         | BD Transduction Laboratories; San Jose, CA, USA | 610197         | Monoclonal | Mediator of apoptosis                 |
| Rabbit anti-nitrotyrosine IgG   | 1:25,000      | Millipore; Darmstadt, Germany                   | 06-284         | Polyclonal | Marker of inflammation                |
| Rabbit anti-Iba1 IgG            | 1:1,000       | Wako; Richmond, VA, USA                         | 016-20001      | Polyclonal | Microglia/macrophage marker           |
| Mouse anti-Hsp70 IgG            | 1:1,000       | Abcam; Cambridge, UK                            | Ab2787         | Monoclonal | Involved in unfolded protein response |
| Mouse anti-ERN1 IgG             | 1:500         | Abgent; San Diego, CA, USA                      | AO1361a        | Monoclonal | Involved in unfolded protein response |
| Rabbit anti-PERK IgG            | 1:1,000       | Cell Signaling Technology; Danvers, MA, USA     | 3192           | Monoclonal | Involved in unfolded protein response |
| Rabbit anti-pERN1 IgG           | 1:1,000       | Novus Biologicals; Littleton, CO, USA           | NB100-2323     | Polyclonal | Involved in unfolded protein response |
